# Supplementary material
Source: PubMed Central journal article supplement (PMC3027179)
Supplement: supp_tpc.110.077537_Supplemental_Data.pdf [file supp_tpc.110.077537_Supplemental_Data.pdf]

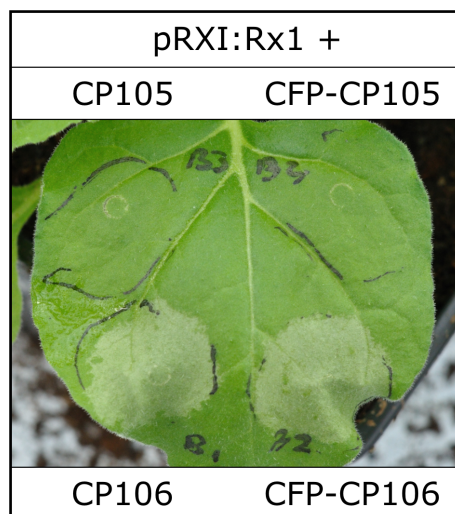

**Supplemental Figure 1.**

Activation of endogenous promoter expressed Rx1 (pRXI:Rx1) by the avirulent PVX CP (CP106) and a fluorescent protein fusion thereof (CFP-CP106). Virulent CP constructs (CP105 and CFP-CP105) were expressed as controls. The image was taken 48 hpi.

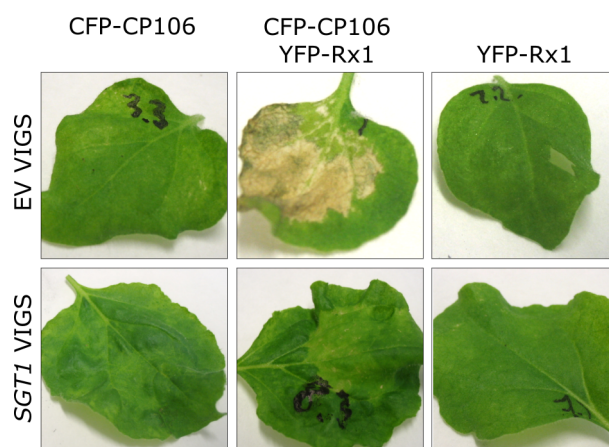

**Supplemental Figure 2.**

Rx1 mediated cell death is suppressed in *SGT1*-silenced *Nicotiana benthamiana*. Transient expression of CFP-CP106 and YFP-Rx1 in empty vector (EV) VIGS plants and *SGT1* VIGS plants. Coexpression of CFP-CP106 and YFP-Rx1 leads to a cell death response in EV VIGS plants, but not in *SGT1*-silenced plants. CFP-CP106 and YFP-Rx1 agroinfiltration 21 days after TRV infection. Images taken 6 days after agroinfiltration.

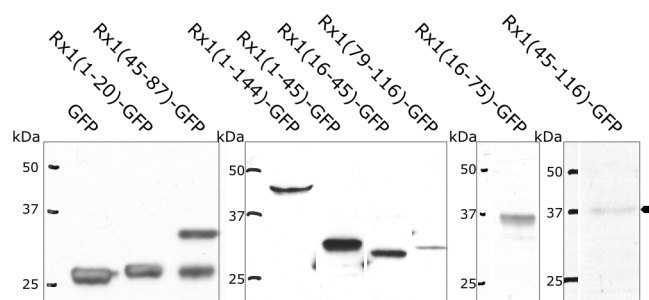

**Supplemental Figure 3.**

Anti-GFP immunoblot of the GFP-fused CC fragments. Expression via agroinfiltration assay in leaves of *N. benthamiana*. Proteins of the expected size were detected with an anti-GFP antibody and free GFP (27 kDa) was used as a control. Only for Rx1(45-89)-GFP, an additional band was observed.

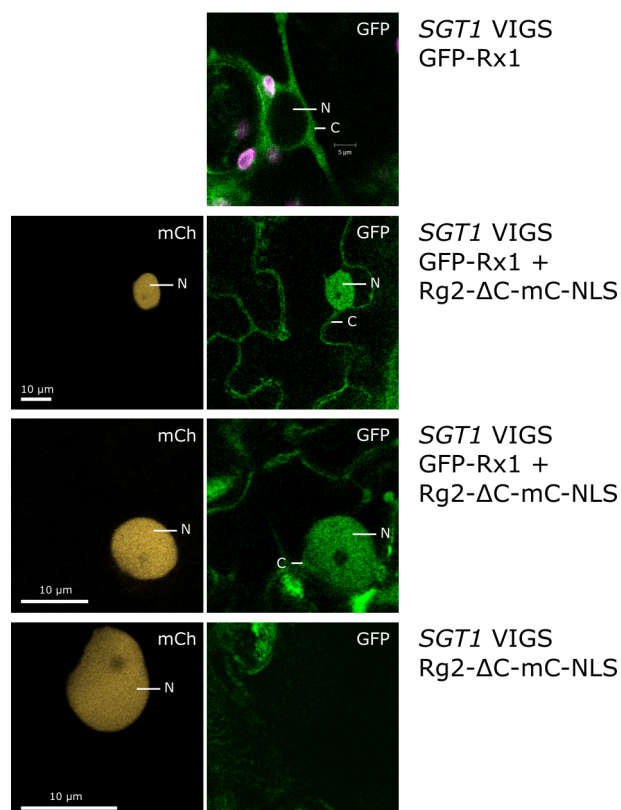

**Supplemental Figure 4.**

Relocalization of GFP-Rx1 in *SGT1*-silenced cells under influence of an NLS-fused RanGAP2 WPP construct (Rg2-ΔC-mC-NLS). The top panel shows the mostly cytoplasmic localization of GFP-Rx1 in *SGT1*-silenced plants. The coexpressed RanGAP2 WPP domain is visualized via an red fluorescent protein (mCherry) fusion (left panels). The WPP fragment localizes almost exclusively to the nucleus due to the attached nuclear localization signal. The lower right panel shows that in the absence of GFP-Rx1 no GFP signal can be seen in the nucleus; there is no discernable bleed through of the mCherry signal in the GFP detection channel. Nuclei (N) and cytoplasm (C) are indicated.

**Supplemental Table 1.**

Nucleotide sequences of the oligonucleotides used in plasmid construction.

| Name          | Nucleotide sequence (5' – 3')                                                     |
|---------------|-----------------------------------------------------------------------------------|
| 5GpRxbn       | TTTTTTGGATCCATGGCTTATGCTGCTGTTACTTCCC                                             |
| Rxrev         | GATAGCGTCGACCACCTTAACTACTCGCTGCA                                                  |
| RxLSFor       | TACGACCATGGATGGCTTATGCTGCTGTTAC                                                   |
| 5UTRkp        | TGGTACCTTCTGCAGCGAGTAGTTAAGGTGTTCTGAGGAC                                          |
| 3UTRrev       | CTTAATTAACCCGGGAGATTGAGGACTCCCAAGAAAGG                                            |
| bRxAdeIf      | GAGATTCATATGTGCATCACCCAC                                                          |
| RxbnREV       | AGCATAAGCCATGGATCCAAAAAATAGAAATATCTCT                                             |
| 5CFPsbm       | GTGACCGGATCCATGGTGAGCAAGGGCGAGGAGCTGTTCC                                          |
| 3CFPsrk       | AGGTACCTTAGCTCATGACTGACTTGTAGAGCTCGTCCATGCCGAGAG                                  |
| CBPY1         | CACACCGTATGCGGCCGCTGCAGTCGACGGTGTATGTTG                                           |
| CBPY2         | CATGACCACATCACCGTCACTGCAGCGGCCGCATACGGTGTGCATG                                    |
| SV1           | CATGGGCCCTAAAAAGAAGCGTAAGGTTGAGGACCCTGGATCCGTGAATTCTG                             |
| SV2           | CTAGCAGAATTCACGGATCCAGGGTCTCAACCTTACGCTTCTTTTTAGGGCC                              |
| SVmut1        | CATGGGCCCTAAAAACAAGCGTAAGGTTGAGGACCCTGGATCCGTGAATTCTG                             |
| SVmut2        | CTAGCAGAATTCACGGATCCAGGGTCTCAACCTTACGCTTCTTTTTAGGGCC                              |
| PK1           | CTACAAGGCCATGGGTAACGAGCTTGCATTAAAGCTCGCTGGTCTTGATATTAACAAGGGATCCGGT<br>G          |
| PK2           | CTAGCACCAGGATCCCTTGTTAATATCAAGACCAGCGAGCTTAAATGCAAGCTCGTTACCCATGGCC<br>TTGTAGAGCT |
| linker 12for  | AGCTCTACAAGGGCGGCGGAAGTGGAGGCGGATCCGGGGGAGGCAGCATG                                |
| linker12rev   | CTGCCTCCCCCGGATCCGCTCCACTTCCGCCGCCCTTGTAAG                                        |
| 5RexFor       | CAAAGAGATTGATTTGGGGG                                                              |
| 3Rxnnot       | GCTTCTTCCGCAATAATGTCGAGGGTGCAGGCCGCTTAAAGTACCAG                                   |
| 3LysRrev      | AGTTGTTCTCCCGATGCCTCCCATCCC                                                       |
| 5LysRfor      | GGAGGCATCGGGAGAACAACCTTTGGCTACA                                                   |
| 3NBSeRev      | TGGTACCTTAAGAATTCATGTTTCGAGCTTCCCTCAAACAG                                         |
| For-LRRrx-1   | ATGAATTTGTGAATGTTATCAGAGG                                                         |
| Rev-LRRrx-1   | CTCGACATTATTGCGGCAAGAAGC                                                          |
| NBSerev       | TGGTACCTTAAGAATTCATGTTTCGAGCTTCCCTCAAACAG                                         |
| Ctyfp1        | AATTCTGGAGGTTCTGGTGGCGGAGGCTCAGGCGGTGGTGAAG                                       |
| Ctyfp2        | CATGCTTCCACCACCGCTGAGCCTCCGCCACCAGAACCTCCAG                                       |
| 5NBSf         | GACCATGGTTGGCCGTGAAAATGAATTTGAG                                                   |
| ApalRev       | GGTACCTTACTGCATGGATTGTGCATGAAT                                                    |
| AN1           | TGCACAATCCATGCAGGCGGCCGCTTAAAGGTAC                                                |
| AN2           | CTTAAGCGGCCGCTGCATGGATTG                                                          |
| 3CCnot        | GTGGTACCTTAAGCGGCCGACCAACCATTATATTCTCGGGCTGC                                      |
| Rev-BamHI-AC  | AGGATCCCATTATATTGCAG                                                              |
| Rev-BamHI-B   | AGGATCCAGTAAGTTCCATTG                                                             |
| For-nc0-CD    | TACCATGGAACCTTACTGGATGTG                                                          |
| For-nc0-EG    | TACCATGGGCGATCATGAGG                                                              |
| Rev-BamHI-ED1 | AGGATCCCCTGCTTCTTTCCTC                                                            |
| For-nc0-F     | TACCATGGCACAGAATTTGGAGG                                                           |
| Rev-BamHI-GF  | AGGATCCGCTGTCCGATGTTGC                                                            |
| 5UK3cp        | TCCATGGGCGGTGGAGTCATGAGCGCACCAGCTAGCACAACACAGCC                                   |
| 3UK3cp        | AGGTACCTGCGGTTATGGTGGTGGTAGAGTGACAACAGC                                           |
| 5HBcp         | TCCATGGGCGGTGGAGTCATGACTACGCCAGCCAACACCACTC                                       |
| 3HBcp         | AGGTACCTGCGGTTATGGTGGGGGTAGTGAGATAACAGC                                           |
| mCh1          | AGTCGACGGATCCATGGTGAGCAAGGGCGAGG                                                  |
| mCh2          | TCCCGGGTACTCGAGCTTGTACAGCTCGTCCATGC                                               |
| NLST1         | TCCAGGGGCCTAAAAAGAAGCGTAAGGTTGAGGACCCTGGATAATCTAGAC                               |
| NLST2         | CCGGGTCTAGATTATCCAGGGTCCCAACCTTACGCTTCTTTTTAGGCCCC                                |
| T1            | CTAGAGGTCGACTCTCGAGTGCACGGATCCT                                                   |
| T2            | TCGAAGGATCCGTGCACTCGAGAGTGCACCT                                                   |
